# Supplementary material for: Dual attenuation of proteasomal and autophagic BMAL1 degradation in ClockΔ19/+ mice contributes to improved glucose homeostasis
Source: PubMed Central journal article supplement (PMC4521189; doi:10.1038/srep12801), 2015-07-31
Supplement: srep12801-s1.pdf [file srep12801-s1.pdf]

## Supplementary Information

### **Dual attenuation of proteasomal and autophagic BMAL1 degradation in *Clock*<sup>Δ19/+</sup> mice contributes to improved glucose homeostasis**

Kwon Jeong<sup>1\*</sup>, Baikun He<sup>1\*</sup>, Kazunari Nohara<sup>1</sup>, Noheon Park<sup>2</sup>, Youngmin Shin<sup>1</sup>, Seonghwa Kim<sup>1</sup>, Kazuhiro Shimomura<sup>3</sup>, Nobuya Koike<sup>4</sup>, Seung-Hee Yoo<sup>1</sup>, Zheng Chen<sup>1</sup>

1. Department of Biochemistry and Molecular Biology, The University of Texas Health Science Center at Houston, 6431 Fannin St., Houston, TX 77030
2. Department of Neuroscience, The University of Texas Southwestern Medical Center, 5323 Harry Hines Blvd., Dallas, TX 75390
3. Department of Neurobiology and Physiology, Center for Sleep and Circadian Biology, Northwestern University, 2205 Tech Drive, Evanston, IL 60201
4. Department of Physiology and Systems Bioscience, Kyoto Prefectural University of Medicine, Kyoto, 602-8566, Japan

\*: These authors contributed equally.

Correspondence should be addressed to Zheng Chen, Department of Biochemistry and Molecular Biology, The University of Texas Health Science Center at Houston, 6431 Fannin Street, MSB 6.200, Houston, TX 77030, USA. Tel.: 713-500-6284; Fax: 713-500-0652; E-mail: Zheng.chen.1@uth.tmc.edu .

This file contains 13 Supplementary Figures and 3 Supplementary Tables.

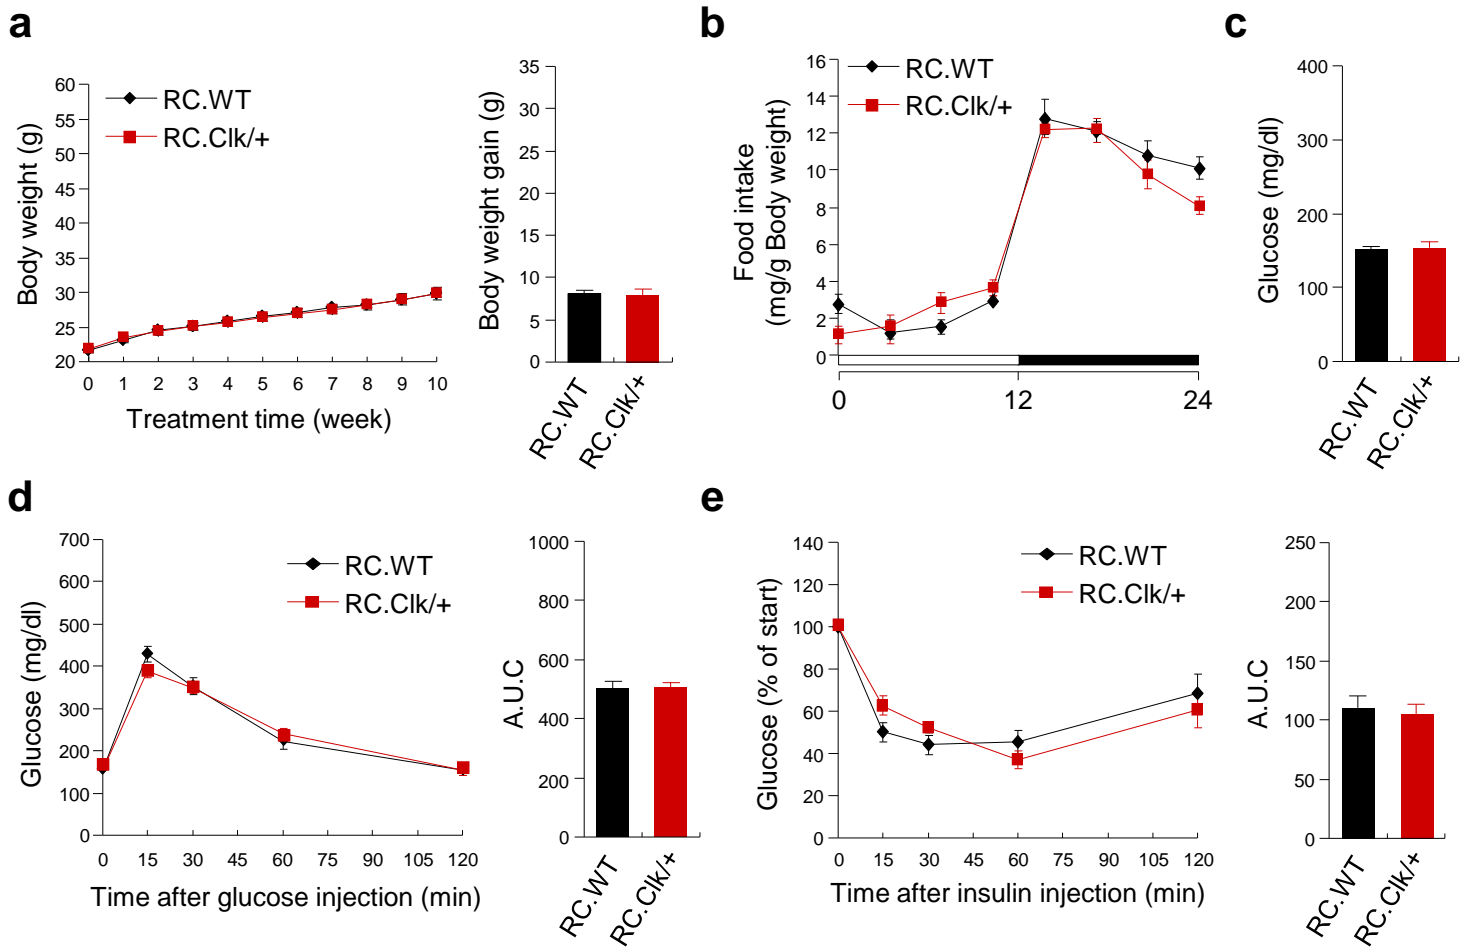

**Supplementary Fig. 1. Under regular chow (RC) feeding *Clock*<sup>Δ19/+</sup> (*Clk*+/+) mutant mice showed similar energy homeostasis with WT mice.** (a) Average body weight of WT and *Clk*+/+ mice fed with RC for 10 weeks (n=6-8). (b) Diurnal rhythm of food intake in RC-fed WT and *Clk*+/+ mice (n=3). (c-e) Fasting glucose levels (c), glucose tolerance test (GTT) (d) and insulin tolerance test (ITT) (e) in WT and *Clk*+/+ mice fed with RC for 10 weeks (n=6-8). Area under curve (A.U.C) data are shown as right panels in (d) and (e). Data are presented as mean ± SEM. One-way ANOVA was performed with SigmaStat.

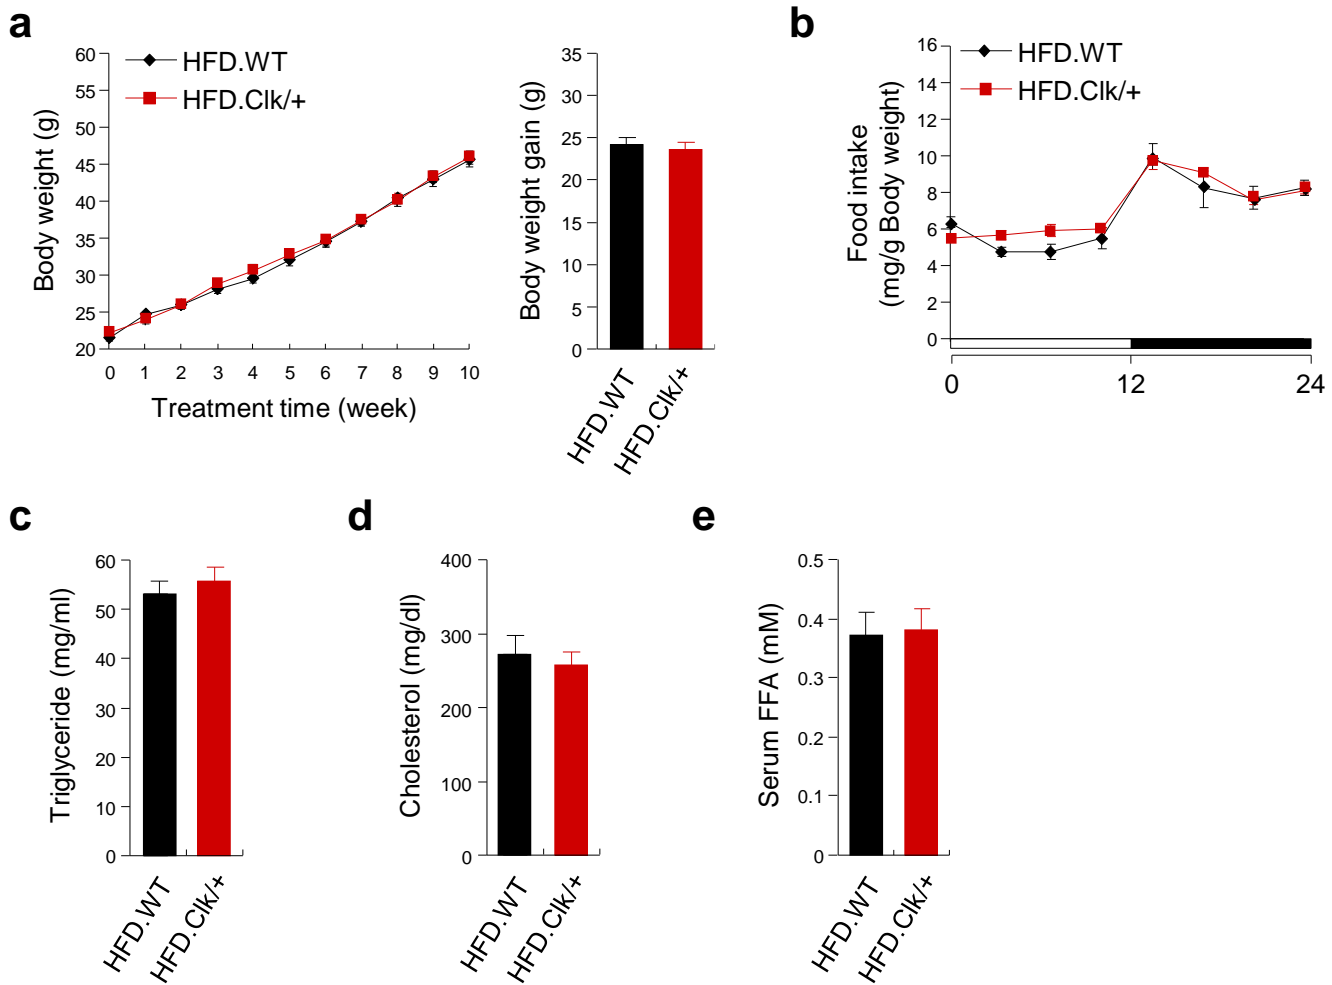

**Supplementary Fig. 2. Clk/+ and WT mice showed similar body weight gain, food intake and serum lipids with high-fat diet (HFD) feeding.** (a) Average body weight (left) and body weight gain (right) of WT and Clk/+ mice fed with HFD for 10 weeks (n=8). (b) Diurnal rhythm of food intake in HFD-fed WT and Clk/+ mice (n=3). (c,d,e) Serum triglyceride (c), cholesterol (d), and free fatty acid (e) levels in WT and Clk/+ fed with HFD mice for 10 weeks (n=6-15). Data are presented as mean  $\pm$  SEM. One-way ANOVA was performed with SigmaStat.

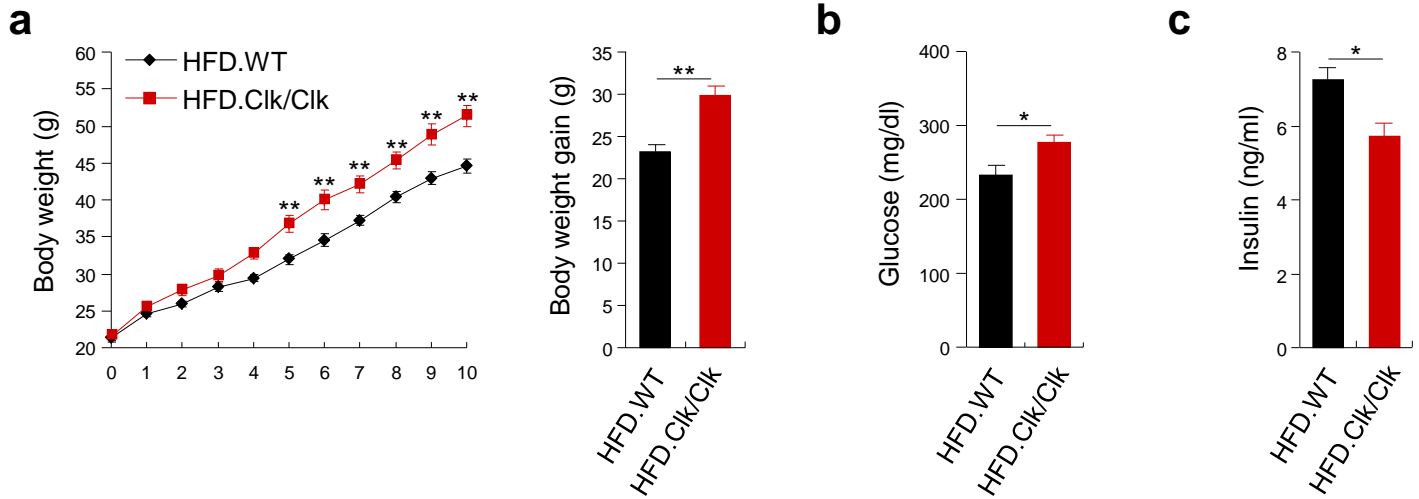

**Supplementary Fig. 3. *Clock* <sup>$\Delta 19/\Delta 19$</sup>  (*Clk/Clk*) mutant mice showed disrupted energy homeostasis with HFD feeding.** Average body weight (a), fasting glucose (b) and insulin level (c) in WT and *Clk/Clk* mice fed with HFD for 10 weeks (n=6-11). Data are presented as means  $\pm$  SEM. \*p<0.05, \*\*p<0.01. One-way ANOVA was performed with SigmaStat.

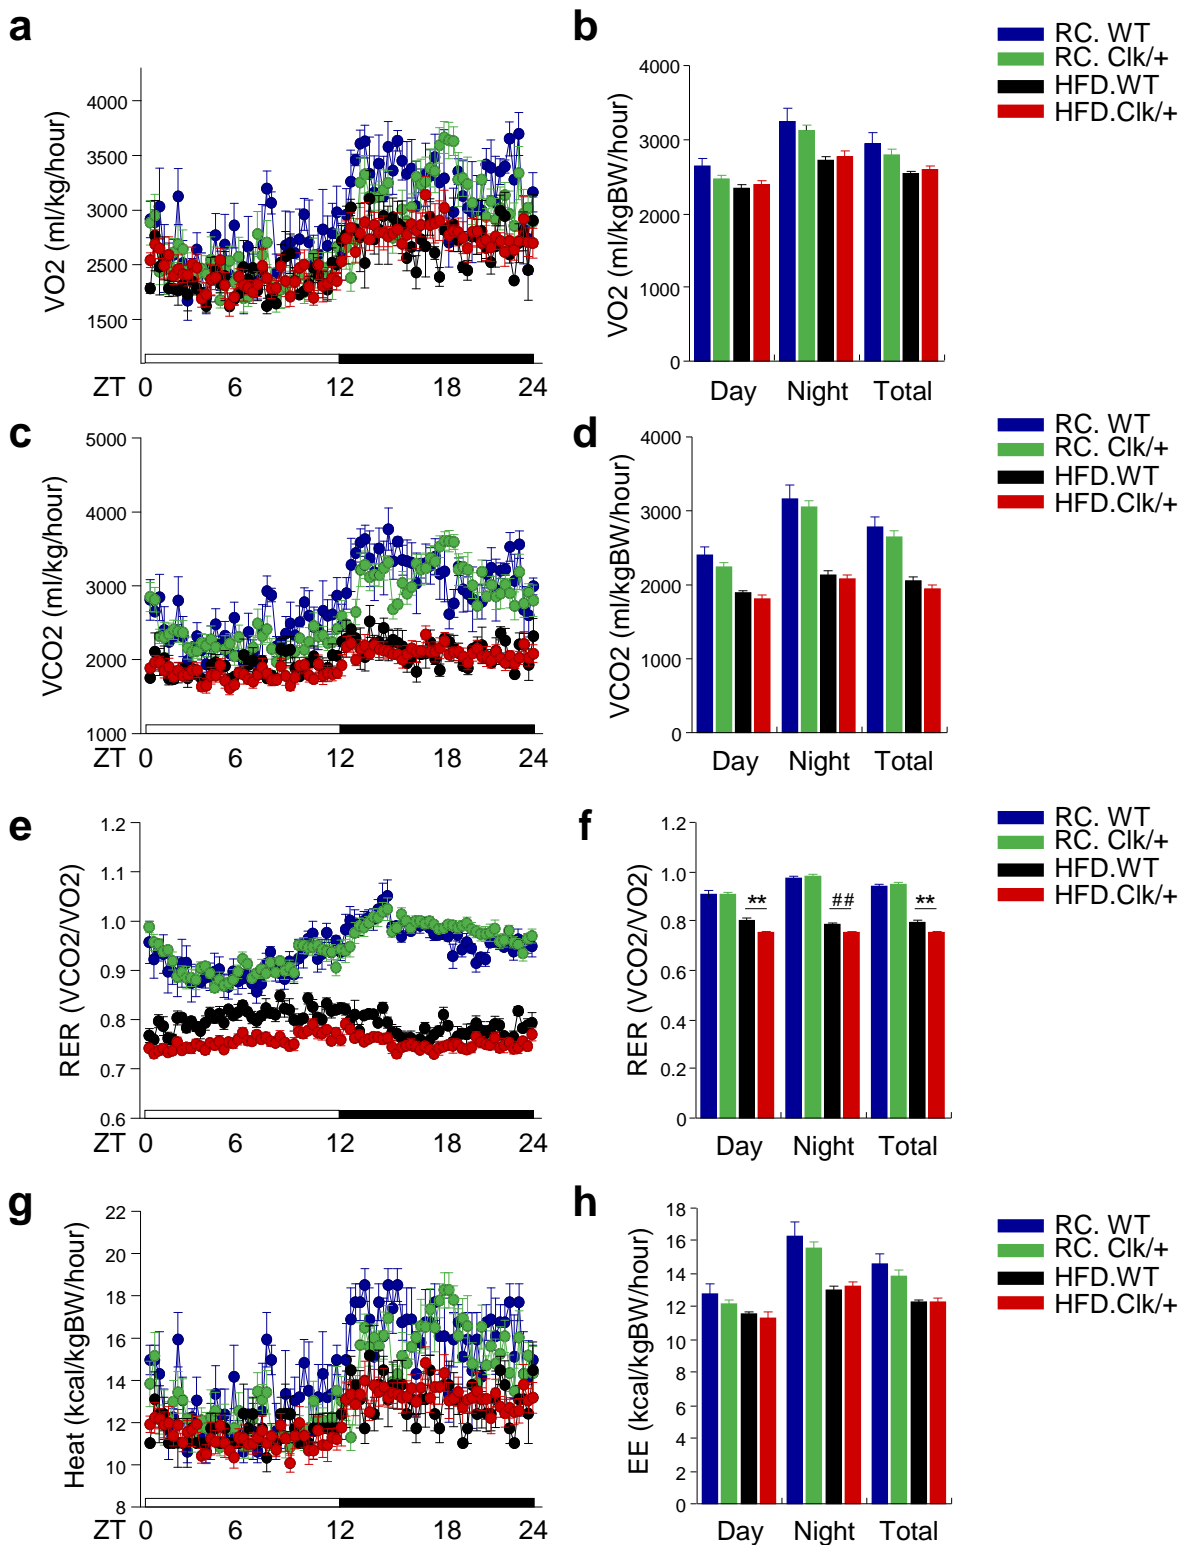

**Supplementary Fig. 4. Daily metabolic rhythm measured by metabolic chambers.** Daily rhythms of  $VO_2$  (a),  $VCO_2$  (c), RER (e) and Heat production (g). (b,d,f,h) Quantification of daytime (ZT0-ZT12), nighttime (ZT12-ZT24) and total (ZT0-ZT24) data from (a), (c), (e) and (g) are shown. \*\* $p < 0.01$ , one-way ANOVA; ## $p < 0.01$ , student's t-test. Note the significant dampening effects of HFD on metabolic rhythmicity.

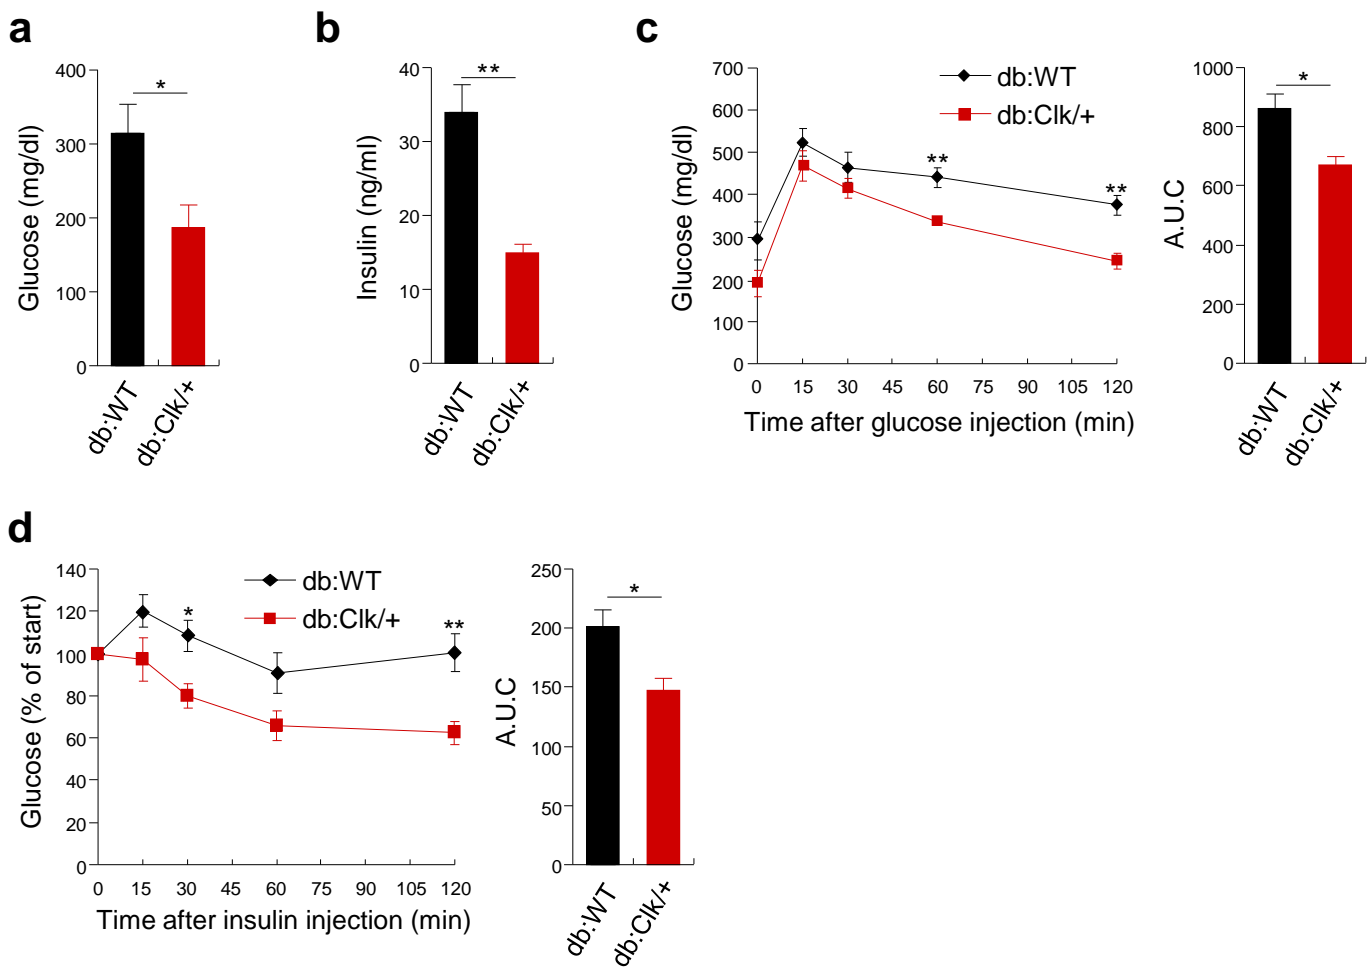

**Supplementary Fig. 5. Clk/+ mutant in the *db/db* genetic background (denoted as *db*) showed improved glucose homeostasis.** Fasting glucose levels (**a**), blood insulin levels (**b**), glucose tolerance test (GTT) (**c**) and insulin tolerance test (ITT) (**d**) in *db:WT* (denoting *db/db* WT) and *db:Clk/+* (denoting *db/db Clk/+*) mutant mice (n=5-6). Area under curve (A.U.C) quantitation is shown for (**c**) and (**d**). Values are presented as means  $\pm$  SEM. \*p<0.05, \*\*p<0.01. One-way ANOVA was performed with SigmaStat.

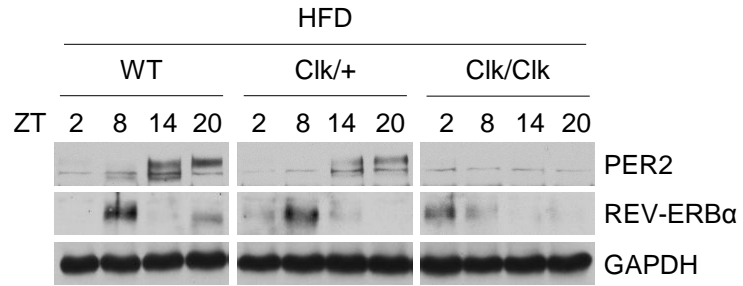

**Supplementary Fig. 6. Immunoblotting analysis of PER2 and REV-ERB $\alpha$  proteins.** Liver tissues from HFD fed WT, Clk/+ and Clk/Clk as described in Fig. 1g were used. GAPDH serves as the loading control.

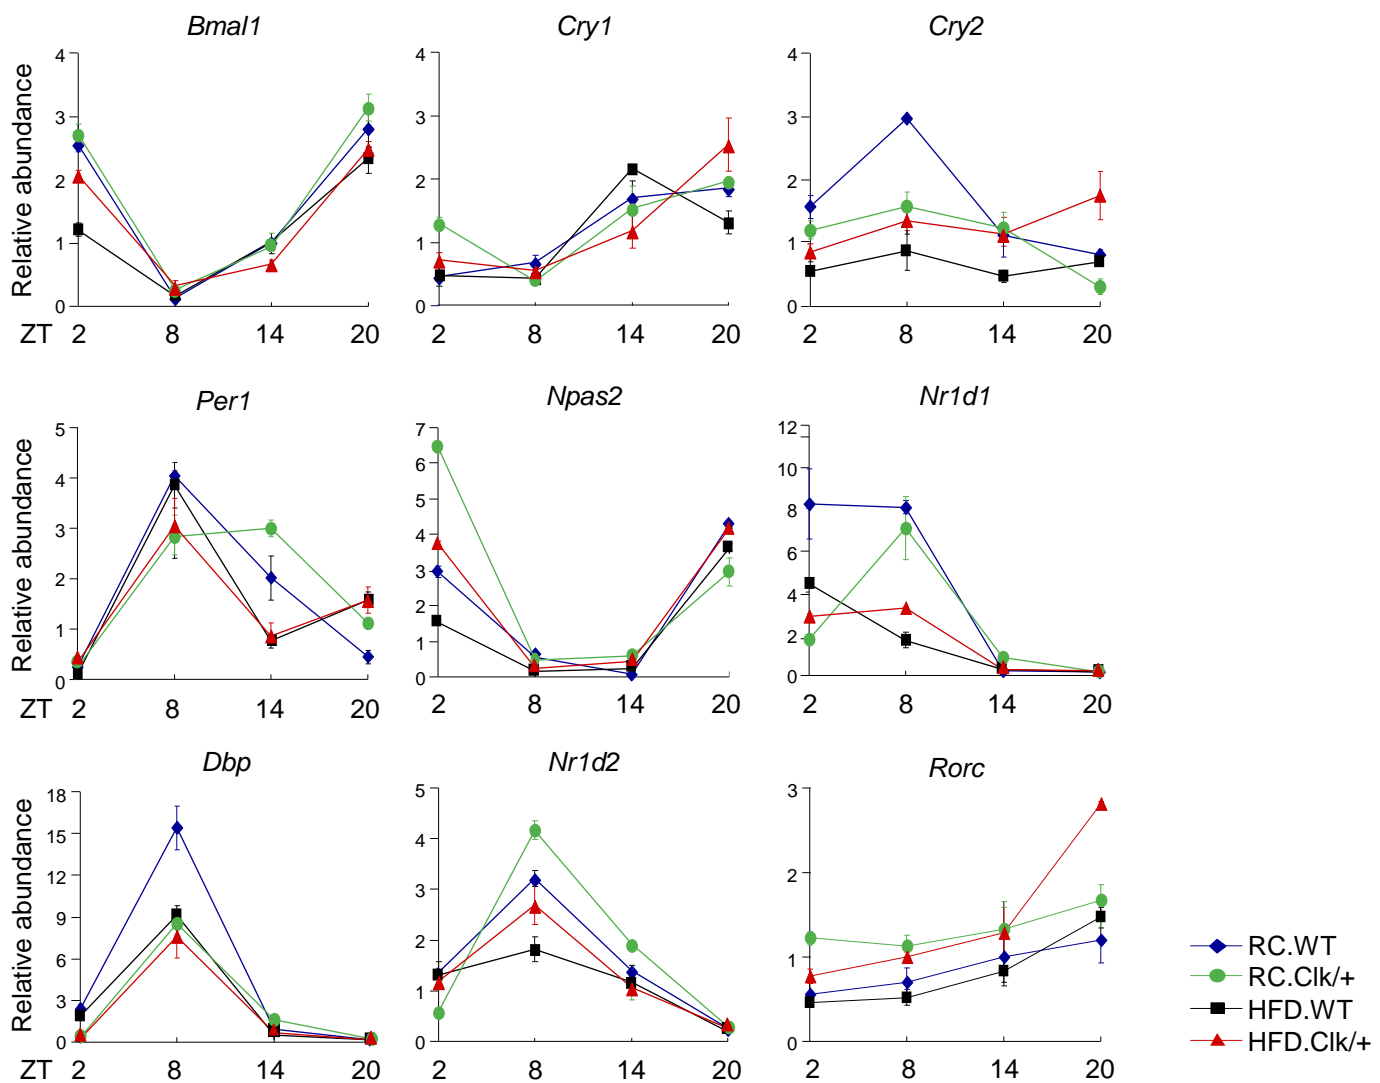

**Supplementary Fig. 7. Real-time qPCR analysis of core clock genes in livers from WT and *Clk*<sup>+/+</sup> mice fed with RC and HFD.** Data are presented as mean  $\pm$  SD. Two-way ANOVA with Bonferroni *post-hoc* tests shows no significant statistical differences between RC.WT and RC.*Clk*<sup>+/+</sup>, whereas significant statistical difference was detected between HFD.WT and HFD.*Clk*<sup>+/+</sup> ( $p < 0.001$ ) in *Bmal1* and *Cry1* expression. Expression of *Npas2* and *Nr1d2* in both RC.*Clk*<sup>+/+</sup> and HFD.*Clk*<sup>+/+</sup> mice was significantly increased compared with RC.WT and HFD.WT respectively ( $p < 0.0001$ ).  $p < 0.0001$ , *Cry2* and *Dbp*, RC.WT vs RC.*Clk*<sup>+/+</sup>.



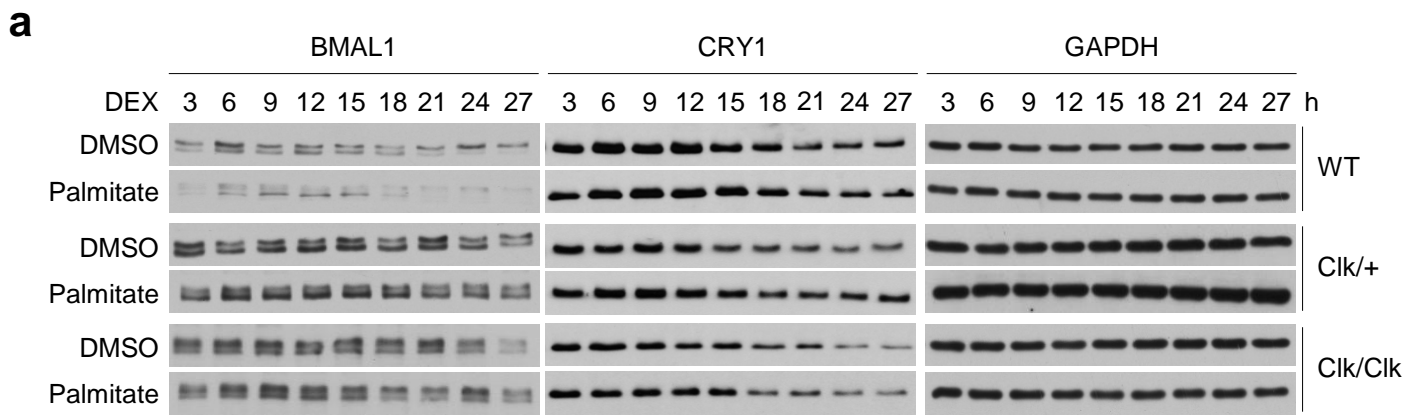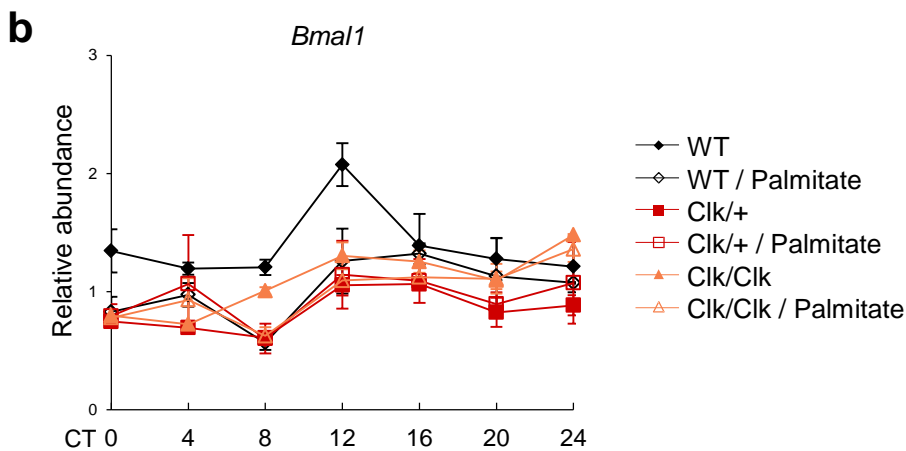

**Supplementary Fig. 8. Effect of palmitate treatment on Bmal1 protein and transcript expression in WT, Clk/+ and Clk/Clk MEFs cells.** (a) Immunoblotting analysis of BMAL1 and CRY1 proteins, and (b) Real-time qPCR analysis of *Bmal1* transcript levels in WT, Clk/+ and Clk/Clk MEFs cells. Two-way ANOVA shows significant differences between WT and WT/Palmitate group ( $p < 0.0001$ ).

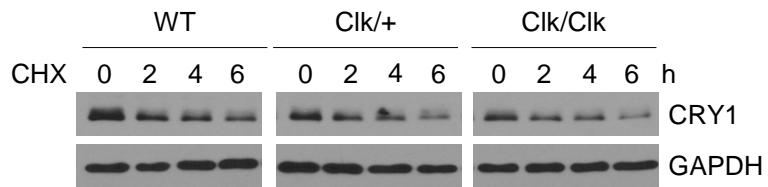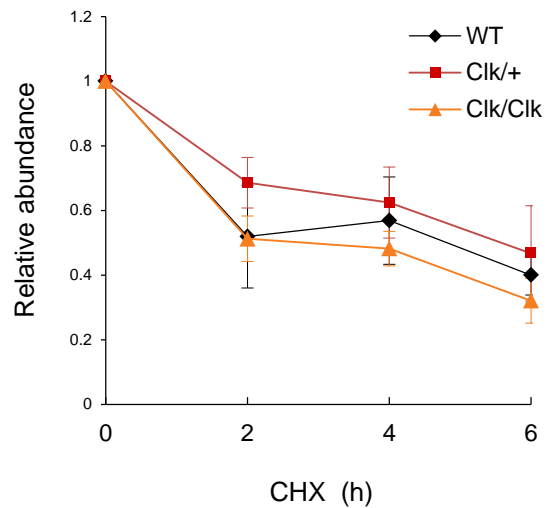

**Supplementary Fig. 9. Effect of CLOCK $\Delta$ 19 on CRY1 protein stability.** WT, Clk/+ and Clk/Clk MEF cells were exposed to cycloheximide (CHX; 25  $\mu$ g/ml) for the indicated times, and BMAL1 levels were assessed by immunoblotting analysis. Quantification is presented in the lower panel. Error bars represent mean  $\pm$  SD (n=3). Half-life was determined by using nonlinear, one-phase exponential decay analysis, WT: 4.4 h, Clk/+: 5.5 h, Clk/Clk: 3.5 h.

**a**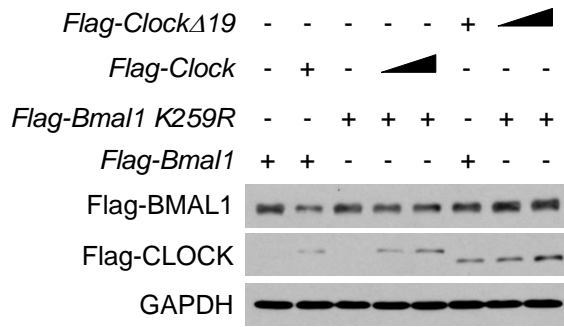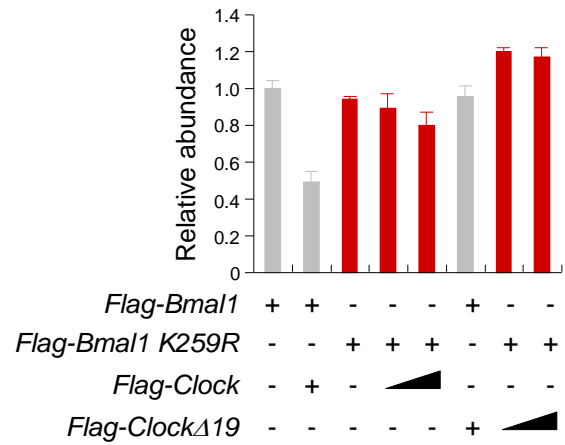**b**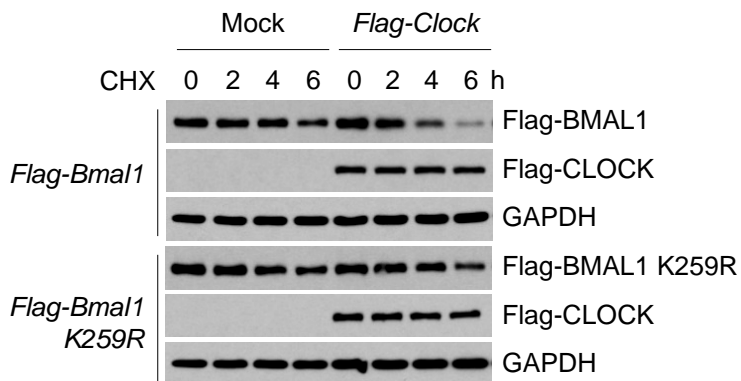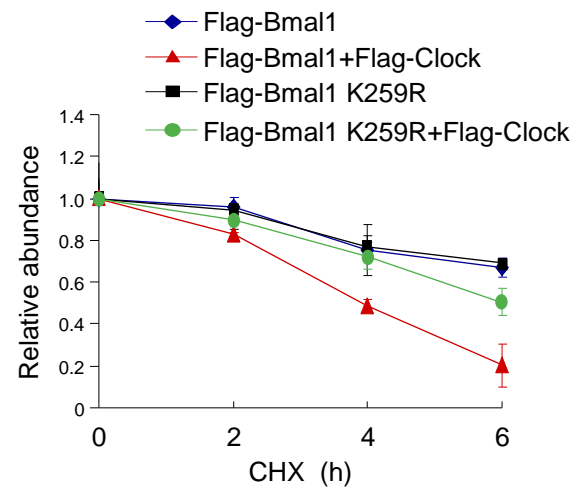**Supplementary Fig. 10. The K259R mutation in BMAL1 abolished effects of CLOCK on BMAL1 stability.**

(a) 293T cells transfected with expression vectors for Flag-BMAL1, Flag-BMAL1 K259R, Flag-CLOCK, and Flag-CLOCK $\Delta$ 19 were lysed and subjected to immunoblotting analysis with antibodies against Flag and GAPDH (loading control). (b) 293T cells transfected with expression vectors for Flag-BMAL1, Flag-BMAL1 K259R, and Flag-CLOCK. These cells were exposed to CHX (25  $\mu$ g/ml) for the indicated times. BMAL1 levels were assessed by immunoblotting at the indicated times after CHX treatment. Right panel: Quantification of the effects of CLOCK on BMAL1 and BMAL1 K259R stability. Error bars represent mean  $\pm$  SD (n=3). Half-life was determined by using nonlinear, one-phase exponential decay analysis.

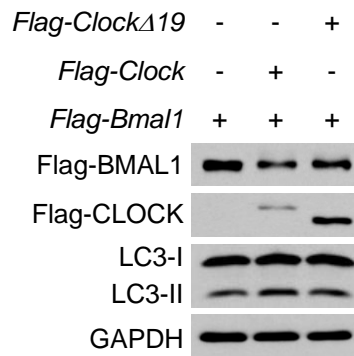

**Supplementary Fig. 11. Ectopic expression of BMAL1, CLOCK and CLOCKΔ19 showed no significant effects on LC3-II level.** 293T cells transfected with expression vectors for Flag-BMAL1, Flag-CLOCK, and Flag-CLOCKΔ19 were lysed and subjected to immunoblotting analysis with antibodies against Flag, LC3B, and GAPDH (loading control).

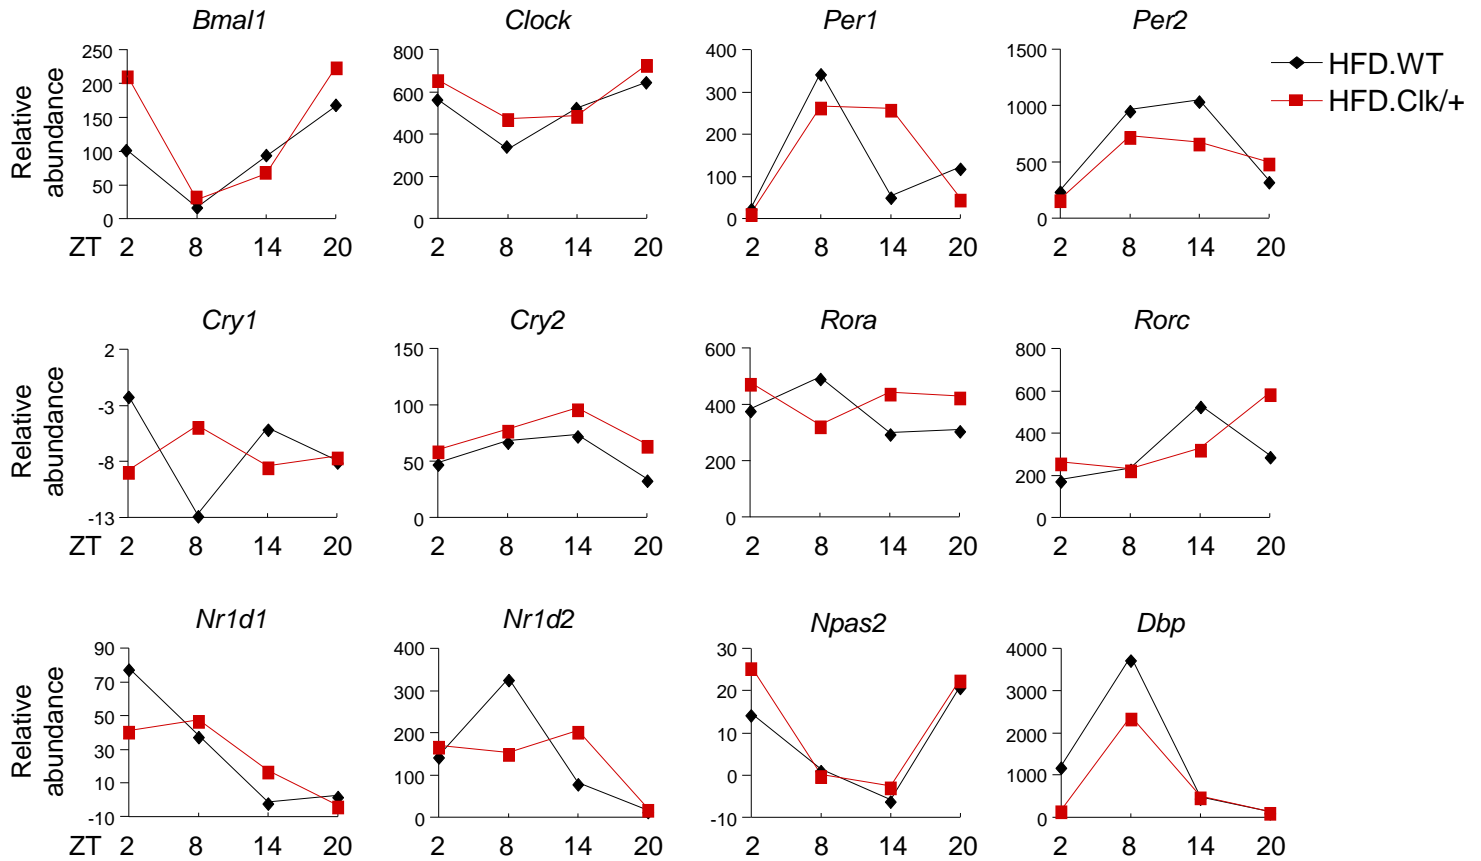

**Supplementary Fig. 12. Expression of core clock genes in the liver of HFD.WT and HFD.Clk/+ mice by microarray analysis.** The mRNAs from liver samples in HFD.Clk/+ and HFD.WT mice collected over the circadian cycle were subjected to microarray analysis. Relative abundance for each transcripts is shown.

**a**

Higher expression in HFD.WT mice

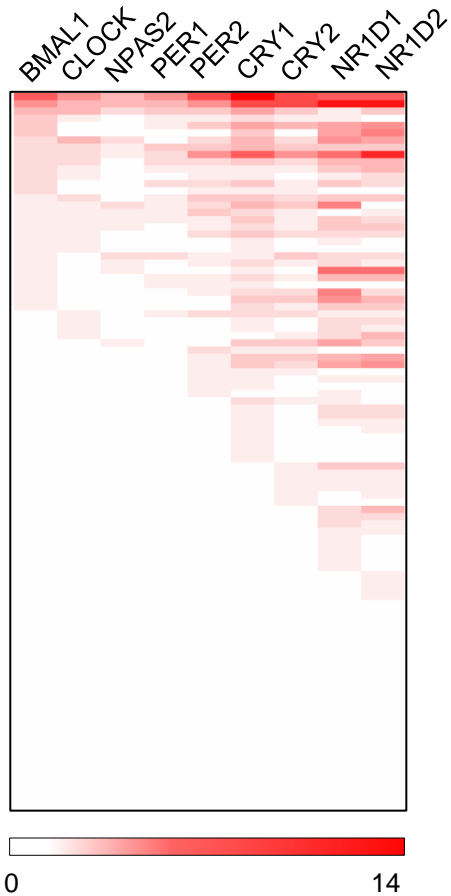**b**

Higher expression in HFD.Clk/+mice

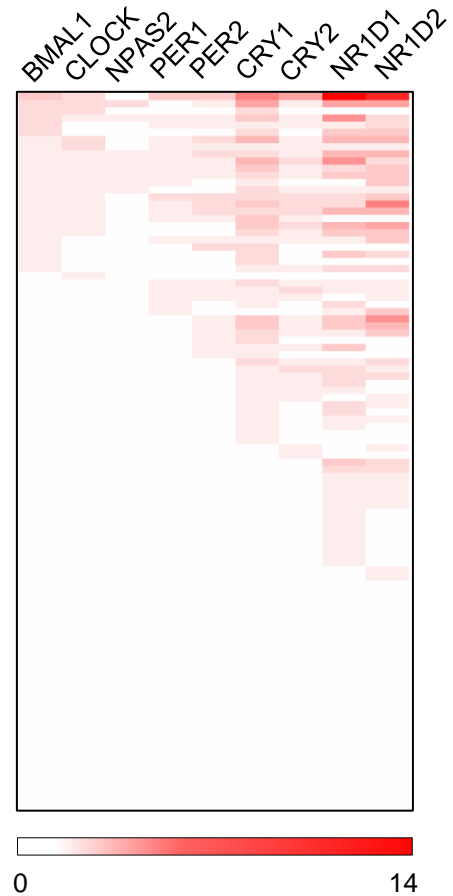

**Supplementary Fig. 13. Heat maps of clock protein binding on the promoters of genes with higher expression levels in HFD.WT (a) or HFD.Clk/+ (b).** Analysis was based on published ChIP-Seq results (Koike et al., 2012; Cho et al., 2012). The red scale shows the extent of binding as quantified by enrichment of immunoprecipitated DNA fragments.

Supplementary Table 1. List of liver genes down-regulated in HFD.Clk/+ relative to HFD.WT mice (fold change  $\geq 1.20$  ) as identified by microarray analysis.

| Gene          | Fold Change | p-Value |
|---------------|-------------|---------|
| TRIM52        | 86.50       | 0.049   |
| 1110054O05RIK | 48.00       | 0.023   |
| ASB7          | 42.29       | 0.039   |
| TGFBR2        | 26.11       | 0.043   |
| D3BWG0562E    | 19.00       | 0.043   |
| 1700109H08RIK | 13.90       | 0.026   |
| GPS1          | 7.00        | 0.041   |
| GLOD4         | 6.58        | 0.027   |
| ARID4A        | 6.48        | 0.029   |
| ST6GALNAC4    | 6.06        | 0.006   |
| CDC6          | 4.31        | 0.048   |
| RNF208        | 3.95        | 0.008   |
| BC028528      | 3.86        | 0.021   |
| DUSP6         | 3.13        | 0.004   |
| TM4SF4        | 3.10        | 0.040   |
| DFNA5H        | 2.84        | 0.038   |
| PHF12         | 2.81        | 0.040   |
| COL27A1       | 2.71        | 0.018   |
| RNF26         | 2.70        | 0.007   |
| EPHA7         | 2.65        | 0.024   |
| SMPD3         | 2.62        | 0.034   |
| MICAL2        | 2.59        | 0.006   |
| SAMD4         | 2.56        | 0.038   |
| ERDR1         | 2.51        | 0.009   |
| CML4          | 2.39        | 0.034   |
| RIPK3         | 2.31        | 0.011   |
| GM1568        | 2.30        | 0.046   |
| LOC100045188  | 2.29        | 0.006   |
| BIRC5         | 2.24        | 0.041   |
| BC016423      | 2.20        | 0.005   |
| KLC2          | 2.06        | 0.013   |
| CSF1          | 2.03        | 0.042   |
| OLFR497       | 2.02        | 0.026   |
| GIT1          | 2.01        | 0.033   |
| SMURF1        | 1.96        | 0.039   |
| RFTN2         | 1.93        | 0.046   |
| 1110004E09RIK | 1.92        | 0.025   |
| SYNM          | 1.88        | 0.025   |
| MME           | 1.88        | 0.037   |
| DVL1          | 1.88        | 0.025   |
| BRE           | 1.85        | 0.023   |
| AIFM2         | 1.82        | 0.009   |

|               |      |       |
|---------------|------|-------|
| SH3D19        | 1.79 | 0.035 |
| VGLL2         | 1.79 | 0.023 |
| 1200011M11RIK | 1.78 | 0.044 |
| GRIN2C        | 1.78 | 0.043 |
| SERPINA3H     | 1.74 | 0.024 |
| GPC1          | 1.72 | 0.015 |
| 1110048D14RIK | 1.72 | 0.013 |
| C1QTNF3       | 1.69 | 0.010 |
| LIG4          | 1.69 | 0.039 |
| HDAC6         | 1.68 | 0.041 |
| PDZD8         | 1.68 | 0.019 |
| NLN           | 1.68 | 0.036 |
| CLEC1A        | 1.67 | 0.042 |
| GTPBP5        | 1.65 | 0.040 |
| PAPLN         | 1.64 | 0.014 |
| CCDC49        | 1.64 | 0.015 |
| PAM           | 1.63 | 0.050 |
| SLC25A25      | 1.62 | 0.030 |
| HPCAL1        | 1.61 | 0.048 |
| TCFCP2        | 1.58 | 0.028 |
| CCND1         | 1.56 | 0.028 |
| SMPD4         | 1.55 | 0.026 |
| HABP4         | 1.53 | 0.021 |
| ZGPAT         | 1.51 | 0.028 |
| CRIM2         | 1.50 | 0.030 |
| BC057893      | 1.50 | 0.017 |
| ENO3          | 1.49 | 0.011 |
| DST           | 1.49 | 0.012 |
| ARHGAP25      | 1.49 | 0.031 |
| PAQR7         | 1.48 | 0.015 |
| GTPBP6        | 1.47 | 0.008 |
| TRIP6         | 1.46 | 0.023 |
| ST3GAL3       | 1.44 | 0.048 |
| RND3          | 1.43 | 0.043 |
| EMILIN1       | 1.43 | 0.029 |
| ARL2BP        | 1.41 | 0.043 |
| POM121        | 1.41 | 0.017 |
| MLKL          | 1.41 | 0.007 |
| SMU1          | 1.41 | 0.029 |
| MTMR14        | 1.40 | 0.048 |
| TRIB2         | 1.40 | 0.027 |
| NCDN          | 1.39 | 0.019 |
| NCKIPSD       | 1.38 | 0.034 |
| L3MBTL3       | 1.38 | 0.038 |
| OASL1         | 1.38 | 0.020 |
| 4933407P14RIK | 1.37 | 0.039 |
| CCND1         | 1.37 | 0.027 |



|               |      |       |
|---------------|------|-------|
| CUL2          | 1.36 | 0.025 |
| 3110082117RIK | 1.36 | 0.044 |
| SWAP70        | 1.36 | 0.019 |
| IFIT3         | 1.35 | 0.049 |
| HSD17B11      | 1.35 | 0.021 |
| DUSP6         | 1.34 | 0.033 |
| PTPLB         | 1.33 | 0.031 |
| RAB3A         | 1.32 | 0.024 |
| TSEN2         | 1.32 | 0.020 |
| SKP2          | 1.30 | 0.039 |
| RIOK1         | 1.29 | 0.019 |
| SRF           | 1.28 | 0.018 |
| 1190005106RIK | 1.27 | 0.029 |
| ENTPD5        | 1.26 | 0.029 |
| D6WSU176E     | 1.25 | 0.018 |
| THOC5         | 1.24 | 0.002 |
| PIAS2         | 1.24 | 0.012 |
| BLVRB         | 1.23 | 0.020 |
| TPI1          | 1.22 | 0.044 |
| SNAPC3        | 1.22 | 0.034 |
| IPO5          | 1.22 | 0.048 |

Supplementary Table 2. List of liver genes up-regulated in HFD.Clk/+ over HFD.WT mice (fold change  $\geq 1.20$ ) as identified by microarray analysis. The genes marked in red are denoted by KEGG in the "Metabolic pathways".

| Gene           | Fold Change  | p-Value      |
|----------------|--------------|--------------|
| 0610012A05RIK  | 78.75        | 0.045        |
| FFAR3          | 51.56        | 0.004        |
| NR5A1          | 36.11        | 0.009        |
| FXYD2          | 24.11        | 0.031        |
| LOC225594      | 10.67        | 0.016        |
| PIK3R6         | 10.58        | 0.037        |
| TCFAP2A        | 10.39        | 0.021        |
| <b>FUT7</b>    | <b>10.35</b> | <b>0.030</b> |
| 4933429E10RIK  | 10.25        | 0.028        |
| ITGB6          | 6.81         | 0.026        |
| 9130401M01RIK  | 4.71         | 0.014        |
| ADAT1          | 3.79         | 0.027        |
| HIST1H2AA      | 3.67         | 0.044        |
| <b>B3GALT5</b> | <b>3.65</b>  | <b>0.047</b> |
| COL11A2        | 3.22         | 0.009        |
| KRT78          | 3.03         | 0.045        |
| SHC1           | 2.76         | 0.030        |
| <b>B4GALT2</b> | <b>2.76</b>  | <b>0.016</b> |
| NCOA2          | 2.72         | 0.016        |
| <b>CYP2C55</b> | <b>2.61</b>  | <b>0.024</b> |
| CAR5B          | 2.54         | 0.001        |
| RBBP5          | 2.52         | 0.043        |
| CPSF2          | 2.41         | 0.016        |
| AA407270       | 2.39         | 0.017        |
| OLFR1412       | 2.39         | 0.010        |
| PTPRF          | 2.38         | 0.046        |
| 2410081M15RIK  | 2.36         | 0.045        |
| KNS2           | 2.35         | 0.021        |
| LOC100047323   | 2.33         | 0.029        |
| GPR3           | 2.30         | 0.009        |
| TMED9          | 2.30         | 0.049        |
| CFH            | 2.20         | 0.038        |
| GDAP1L1        | 2.17         | 0.036        |
| MST1           | 2.14         | 0.023        |
| 1500002O20RIK  | 2.13         | 0.008        |
| A930008G19RIK  | 2.12         | 0.040        |
| ELF2           | 2.07         | 0.002        |
| <b>PLA2G5</b>  | <b>1.97</b>  | <b>0.025</b> |
| HRH1           | 1.97         | 0.029        |
| <b>HMBS</b>    | <b>1.89</b>  | <b>0.014</b> |
| PRH1           | 1.86         | 0.047        |

|               |             |              |
|---------------|-------------|--------------|
| <b>RDH10</b>  | <b>1.85</b> | <b>0.007</b> |
| RAB13         | 1.85        | 0.034        |
| TCHP          | 1.81        | 0.016        |
| SLC27A1       | 1.80        | 0.037        |
| MRRF          | 1.79        | 0.007        |
| SLC4A1        | 1.76        | 0.012        |
| OLFR707       | 1.74        | 0.008        |
| TFPI          | 1.71        | 0.006        |
| OXNAD1        | 1.71        | 0.049        |
| DLL1          | 1.70        | 0.022        |
| USF2          | 1.66        | 0.009        |
| ARID4B        | 1.62        | 0.013        |
| TNFAIP8L2     | 1.60        | 0.028        |
| METRNL        | 1.59        | 0.044        |
| DYNLL2        | 1.59        | 0.021        |
| PDE1A         | 1.59        | 0.013        |
| ZFP101        | 1.59        | 0.019        |
| RAB5B         | 1.58        | 0.032        |
| SLC12A9       | 1.57        | 0.018        |
| CLUAP1        | 1.57        | 0.007        |
| LOC669168     | 1.55        | 0.039        |
| BICD2         | 1.53        | 0.001        |
| ICOS          | 1.52        | 0.030        |
| SCYL1         | 1.51        | 0.035        |
| FAIM          | 1.50        | 0.012        |
| AMY2          | 1.49        | 0.025        |
| ZFP60         | 1.49        | 0.002        |
| GPN1          | 1.47        | 0.004        |
| TRAPPC2       | 1.47        | 0.020        |
| <b>SIAT7F</b> | <b>1.46</b> | <b>0.027</b> |
| <b>PTGS1</b>  | <b>1.45</b> | <b>0.048</b> |
| CLEC4F        | 1.44        | 0.042        |
| SLC25A34      | 1.44        | 0.030        |
| PDLIM5        | 1.43        | 0.019        |
| CASP6         | 1.42        | 0.026        |
| HOXB5         | 1.40        | 0.008        |
| HIST1H3D      | 1.39        | 0.027        |
| <b>AFMID</b>  | <b>1.38</b> | <b>0.050</b> |
| PAIP2B        | 1.38        | 0.042        |
| EG545253      | 1.38        | 0.009        |
| GSTM6         | 1.37        | 0.014        |
| <b>AFMID</b>  | <b>1.37</b> | <b>0.038</b> |
| ZKSCAN14      | 1.36        | 0.024        |
| TCF20         | 1.36        | 0.018        |
| TMEM19        | 1.35        | 0.030        |
| <b>AASS</b>   | <b>1.33</b> | <b>0.020</b> |
| RPL7L1        | 1.33        | 0.032        |

|               |      |       |
|---------------|------|-------|
| ARMC8         | 1.32 | 0.008 |
| HUS1          | 1.32 | 0.012 |
| DHDH          | 1.32 | 0.009 |
| HERPUD2       | 1.32 | 0.033 |
| ZFP326        | 1.31 | 0.016 |
| STAB1         | 1.31 | 0.031 |
| GPS2          | 1.30 | 0.024 |
| MGAT1         | 1.29 | 0.011 |
| ELTD1         | 1.28 | 0.019 |
| EDNRB         | 1.28 | 0.016 |
| LIMK2         | 1.28 | 0.049 |
| ABCA3         | 1.27 | 0.040 |
| ADSSL1        | 1.27 | 0.035 |
| ALG8          | 1.26 | 0.033 |
| BAT3          | 1.26 | 0.021 |
| D4WSU132E     | 1.24 | 0.016 |
| NAGS          | 1.23 | 0.030 |
| TCP1          | 1.23 | 0.049 |
| SCARF1        | 1.22 | 0.012 |
| SERHL         | 1.22 | 0.034 |
| DAP3          | 1.22 | 0.030 |
| SGPL1         | 1.21 | 0.037 |
| 2700078K21RIK | 1.21 | 0.017 |
| TRAPPC3       | 1.21 | 0.043 |
| TMEM2         | 1.20 | 0.036 |
| STAB2         | 1.20 | 0.031 |

Supplementary Table 3. Primer sequences for real-time PCR analysis of mouse gene expression.

| <b>Gene Name</b> | <b>Forward Primer</b>       | <b>Reverse Primer</b>      |
|------------------|-----------------------------|----------------------------|
| <i>Bmal1</i>     | CCAAGAAAGTATGGACACAGACAAA   | GCATTCTTGATCCTTCCTTGGT     |
| <i>Cidec</i>     | ATGGACTACGCCATGAAGTCT       | CGGTGCTAACACGACAGGG        |
| <i>Cry1</i>      | CTGGCGTGGAAGTCATCGT         | CTGTCCGCCATTGAGTTCTATG     |
| <i>Cry2</i>      | TGTCCCTTCCTGTGTGGAAGA       | GCTCCAGCTTGGCTTGA          |
| <i>Dbp</i>       | CGTGGAGGTGCTTAATGACCTTT     | CATGGCCTGGAATGCTTGA        |
| <i>Gapdh</i>     | CAAGGTCATCCATGACAACCTTG     | GGCCATCCACAGTCTTCTGG       |
| <i>Per1</i>      | CCCAGCTTTACCTGCAGAAG        | ATGGTCGAAAGGAAGCCTCT       |
| <i>Pgc-1a</i>    | TATGGAGTGACATAGAGTGTGCT     | CCACTTCAATCCACCCAGAAAG     |
| <i>Nr1d1</i>     | CATGGTGCTACTGTGTAAGGTGTGT   | CACAGGCGTGCACTCCATAG       |
| <i>Nr1d2</i>     | TGAACGCAGGAGGTGTGATTG       | GAGGACTGGAAGCTATTCTCAGA    |
| <i>Rorc</i>      | TCAGCGCCCTGTGTTTTTC         | GAGAACCAGGGCCGTGTAG        |
| <i>Apoa4</i>     | CCAGCTAAGCAACAATGCCA        | TGGAAGAGGGTACTGAGCTGC      |
| <i>Usf2</i>      | GCGTTCGGCGACCACAATA         | GACTACGCGGTATGTCACCTG      |
| <i>Ffar3</i>     | TTCTGAGCGTGGCCTATCCA        | AGACTACACTGACCAGACCAG      |
| <i>Gstm6</i>     | ACAGGTCATGGACTCGAAT         | TGGCTTCCGTTTCTCAAAGTC      |
| <i>G6pc</i>      | ACTGTGGGCATCAATCTCCTC       | CGGGACAGACAGACGTTTCAGC     |
| <i>Npas2</i>     | CAA CAG ACG GCA GCA TCA TCT | TTC TGA TCC ATG ACA TCC GC |
| <i>Hnf4a</i>     | CACGCGGAGGTCAAGCTAC         | CCCAGAGATGGGAGAGGTGAT      |
| <i>Rsk1</i>      | CCATCACACACCACGTCAAG        | TTGCGTACCAGGAAGACTTTG      |
